# Supplementary material
Source: publisher site journal article supplement (https://www.dovepress.com/get_supplementary_file.php?f=193739.docx)
Supplement: Supplementary file 1 [file get_supplementary_file.php]

**Online supplement
Is ramucirumab and paclitaxel therapy beneficial for second-line treatment of metastatic gastric or junctional adenocarcinoma for patients with ascites?
Analysis of RAINBOW phase 3 trial data**

**K. Muro et al.**

**Table S1 Summary of efficacy data for ITT patients with peritoneal metastases, with and without ascites**

|  | **ITT peritoneal metastases population  with ascites subgroup** | | **ITT peritoneal metastases population without ascites subgroup** | |
| --- | --- | --- | --- | --- |
|  | **Ramucirumab + paclitaxel**  **(N=116)** | **Placebo + paclitaxel**  **(N=100)** | **Ramucirumab + paclitaxel**  **(N=47)** | **Placebo + paclitaxel**  **(N=52)** |
| Overall survival |  |  |  |  |
| Median (months) | 7.3 | 5.2 | 10.0 | 6.9 |
| Unstratified log-rank *P* | 0.1681 | | 0.1778 | |
| Unstratified HR | 0.814 (0.606, 1.092) | | 0.734 (0.468, 1.153) | |
| Progression-free survival | | | | |
| Median (months) | 4.1 | 2.8 | 5.3 | 3.0 |
| Unstratified log-rank *P* | 0.0886 | | 0.1042 | |
| Unstratified HR | 0.775 (0.578, 1.039) | | 0.543 (0.456, 1.082) | |

**Abbreviations**: ITT, intent-to-treat.

**Ethics Review Boards for RAINBOW Phase 3 Trial**

| **County** | **Site Number/ Investigator Name** | **Ethical Review Board’s**  **Name and Address** |
| --- | --- | --- |
| Argentina | 110/ Guillermo Luis Lerzo | Comité Independiente de Ética para Ensayos en Farmacología Clínica  Pte. J. E. Uriburu 774, Piso 1  Ciudad de Buenos Aires C1027AAP |
| Argentina | 110/ Guillermo Luis Lerzo | Comité de Docencia e Investigación del Sanatorio de la Providencia  Tucumán 1863  Ciudad de Buenos Aires C1050AAK |
| Australia | 200/ Winston Liauw | Cancer Institute NSW  Clinical Research Ethics Committee  Level 8, 9 Central Avenue  Australian Technology Park  Eveleigh, NSW 2017 |
| Australia | 200/ Winston Liauw | South Eastern Sydney Local Health District  Research Support Office  G71 Edmund Blacket Building  The Prince of Wales Hospital  Barker Street  RANDWICK, NSW 2031 |
| Australia | 201/ Vinod Ganju | Bellberry Limited HREC  229 Greenhill Rd  Dulwich, SA 5065 |
| Australia | 202/ Walter Cosolo | Bellberry Limited HREC  229 Greenhill Rd  Dulwich, SA 5065 |
| Australia | 203/Lara Lipton | Melbourne Health  Human Research Ethics Committee  PO Royal Melbourne Hospital (Office for Research)  Parkville, Victoria 3050 |
| Australia | 204/Dusan Kotasek | Bellberry Limited HREC  229 Greenhill Rd,  Dulwich, SA 5065 |
| Australia | 205/Ray Asghari | Cancer Institute NSW  Clinical Research Ethics Committee  Level 8, 9 Central Avenue  Australian Technology Park  Eveleigh, NSW 2017 |
| Australia | 205/Ray Asghari | South Eastern Sydney Local Health District  Research Support Office  G71 Edmund Blacket Building  The Prince of Wales Hospital  Barker Street  RANDWICK, NSW 2031 |
| Australia | 206/Weng Ng | Cancer Institute NSW Clinical Research Ethics Committee  Level 8, 9 Central Avenue  Australian Technology Park  Eveleigh, NSW 2017 |
| Australia | 206/Weng Ng | South Eastern Sydney Local Health District  Research support office  G71 Edmund Blacket Building  The Prince of Wales Hospital  Barker St  Randwick, NSW 2031 |
| Australia | 207/ Marco Matos | Gold Coast Health Service District Human Research Ethics Committee, Gold Coast Hospital, 108 Nerang Street  Southport, QLD 4215 |
| Australia | 208/ Philip Rodney Clingan | Bellberry Limited HREC  229 Greenhill Rd  Dulwich, SA 5065 |
| Australia | 209/ Sumitra Ananda | Melbourne Health Human Research Ethics Committee. PO Royal Melbourne Hospital (Office for Research)  Parkville, Victoria 3050 |
| Austria | 221/ Hellmut Samonigg | Ethikkommission der Stadt Wien  Thomas-Klestil-Platz 8  Wien 1030 |
| Austria | 225/ Michael Girschikofsky  MAR2013-ongoing  Reinhard Ziebermayr  OCT2010-FEB2013 | Ethikkommission der Stadt Wien  Thomas-Klestil-Platz 8  Wien 1030 |
| Belgium | 240/ Veerle Moons | Commissie Medische Ethiek  Imeldaziekenhuis  Imeldalaan 9  Bonheiden 2820 |
| Belgium | 241/ Jean-Luc Van Laethem | Comité d'Ethique  Hôpital Erasme  Route de Lennik 808  Bruxelles 1070 |
| Belgium | 242/ Alain Hendlisz | Comité d'Ethique  Institut Jules Bordet  Rue Héger-Bordet 1  Bruxelles 1000 |
| Belgium | 243/ Joris Arts | Ethische Commissie  AZ Sint-Lucas Brugge  Sint-Lucaslaan 29  Brugge 8310 |
| Belgium | 244/ Eric Van Cutsem | Commissie Medische Ethiek  Universitaire Ziekenhuizen KU Leuven  Campus Gasthuisberg E330  Herestraat 49  Leuven 3000 |
| Belgium | 245/Marc Peeters | Comité voor Medische Ethiek UZA  Wilrijkstraat 10  Edegem 2650 |
| Brazil | 121/ Giuliano Santos Borges | CONEP - Comissão Nacional de Ética em Pesquisa  SEPN 510 Norte, Bloco A, 1º subsolo,  Edifício Ex-INAN - Unidade II - Ministério da Saúde Brasília - DF 70750-521 |
| Brazil | 121/ Giuliano Santos Borges | Comite de Etica em Pesquisa em Seres Humanos da Universidade do Vale do Itajai - UNIVALI  Rua Uruguai, 458 - Bloco 27, Sala 202 - Centro - Ilajai -Santa Catarina 88302-202 |
| Brazil | 122/ Luis Antonio Pires | CONEP - Comissão Nacional de Ética em Pesquisa  SEPN 510 Norte, Bloco A, 1º subsolo,  Edifício Ex-INAN - Unidade II - Ministério da Saúde Brasília - DF 70750-521 |
| Brazil | 122/ Luis Antonio Pires | Comitê de Ética em Pesquisa da Faculdade de Ciências Medicas e da Saúde - PUC/SP  Praça Dr. Emilio de Moraes, 290, Sorocaba  São Paulo 18030-230 |
| Brazil | 123/ Fernandino Garcia | CONEP - Comissão Nacional de Ética em Pesquisa  SEPN 510 Norte, Bloco A, 1º subsolo,  Edifício Ex-INAN - Unidade II - Ministério da Saúde Brasília - DF 70750-521 |
| Brazil | 123/ Fernandino Garcia | Comitê de Etica em Pesquisa do Hospital SOCOR  Rua Tupis, 1540 - B. Barro Preto  Belo Horizonte - Minas Gerais 30190-062 |
| Brazil | 126/ Marcelo Tanaka | CONEP - Comissão Nacional de Ética em Pesquisa  SEPN 510 Norte, Bloco A, 1º subsolo,  Edifício Ex-INAN - Unidade II - Ministério da Saúde Brasília - DF 70750-521 |
| Brazil | 126/ Marcelo Tanaka | Comitê de Ética em Pesquisa da Sociedade Brasileira e Japonesa de Beneficência Santa Cruz - Hospital Santa Cruz  Rua Santa Cruz, 398 - Vila Mariana  São Paulo 04122-000 |
| Brazil | 127/ Jose Alberto Lopes Nogueira | CONEP - Comissão Nacional de Ética em Pesquisa  SEPN 510 Norte, Bloco A, 1º subsolo,  Edifício Ex-INAN - Unidade II - Ministério da Saúde Brasília - DF 70750-521 |
| Brazil | 127/ Jose Alberto Lopes Nogueira | Comitê de Etica em Pesquisa em Seres Humanos do Hospital Sao Rafael  Av. Sao Rafael, 2152 - 6° andar - B. Sao Marcos- Salvador  Bahia 41256-900 |
| Brazil | 129/ Rodrigo Cunha Guimaraes | CONEP - Comissão Nacional de Ética em Pesquisa  SEPN 510 Norte, Bloco A, 1º subsolo,  Edifício Ex-INAN - Unidade II - Ministério da Saúde Brasília - DF 70750-521 |
| Brazil | 129/ Rodrigo Cunha Guimaraes | Comitê de Ética em Pesquisa da Universidade Federal de Minas Gerais  Avenida Antonio Carlos, 6627- Unidade Administrativa II, 2° andar - sala 2005 - Campus Pampulha - Belo Horizonte - Minas Gerais - Zip code: 31270-901 |
| Brazil | 130/ Roberto Odebrecht Rocha | CONEP - Comissão Nacional de Ética em Pesquisa  SEPN 510 Norte, Bloco A, 1º subsolo,  Edifício Ex-INAN - Unidade II - Ministério da Saúde Brasília - DF 70750-521 |
| Brazil | 130/ Roberto Odebrecht Rocha | Comitê de Etica em Pesquisa em Seres Humanos da Casa de Saude Santa Marcelina  Rua Santa Marcellina, 177 - Itaquera  Sao Paulo –SP 08270-070 |
| Brazil | 131/ Iane Cardoso OCT2012-ongoing  Leonardo Lobato  JUN2010-OCT2012 | CONEP - Comissão Nacional de Ética em Pesquisa  SEPN 510 Norte, Bloco A, 1º subsolo,  Edifício Ex-INAN - Unidade II - Ministério da Saúde Brasília - DF 70750-521 |
| Brazil | 131/ Iane Cardoso OCT2012-ongoing  Leonardo Lobato  JUN2010-OCT2012 | Comitê de Ética em Pesquisa em Seres Humanos do Hospital Pró Cardiaco Pronto Socorro Cardiológico  Rua Paulo Barreto, 86 - Botafogo  Rio de Janeiro 22280-010 |
| Brazil | 132/ Fernando Meton de Alencar Camara Vieira | CONEP - Comissão Nacional de Ética em Pesquisa  SEPN 510 Norte, Bloco A, 1º subsolo,  Edifício Ex-INAN - Unidade II - Ministério da Saúde Brasília - DF 70750-521 |
| Brazil | 132/ Fernando Meton de Alencar Camara Vieira | Comitê de Etica em Pesquisa em Seres Humanos do Istituto Nacional do Cancer - INCA  Rua do Resende, 128 - 2° andar  Rio de Janeiro - RJ 20231-092 |
| Brazil | 133/ Gustavo Colagiovanni Girotto | CONEP - Comissão Nacional de Ética em Pesquisa  SEPN 510 Norte, Bloco A, 1º subsolo,  Edifício Ex-INAN - Unidade II - Ministério da Saúde Brasília - DF 70750-521 |
| Brazil | 133/ Gustavo Colagiovanni Girotto | Comitê de Etica em Pesquisa em Seres Humanos da Faculdade de Medicina de Sao José do Rio Preto - FAMERP/SP  Av. Brigadeiro faria Lima, 5416 - Sao José do Rio Preto  São Paulo 15090-000 |
| Brazil | 134/ Guilherme Luiz Stelko Pereira | CONEP - Comissão Nacional de Ética em Pesquisa  SEPN 510 Norte, Bloco A, 1º subsolo,  Edifício Ex-INAN - Unidade II - Ministério da Saúde Brasília - DF 70750-521 |
| Brazil | 134/ Guilherme Luiz Stelko Pereira | Comitê de Ética em Pesquisa da Faculdade de Medicina da Universidade de São Paulo - FMUSP/SP  Av. Dr. Arnaldo, 455 - Instituto Oscar Freire 1º andar - Cerqueira Cesar  São Paulo 01246-903 |
| Brazil | 135/Leandro Brust | CONEP - Comissão Nacional de Ética em Pesquisa  SEPN 510 Norte, Bloco A, 1º subsolo,  Edifício Ex-INAN - Unidade II - Ministério da Saúde Brasília - DF 70750-521 |
| Brazil | 135/Leandro Brust | Comitê de Ética em Pesquisa em Seres Humanos do Centro Universitario UNIVATES/RS  Rua Avellino Tallini, 171 - Bairro Universitario - Lajeado  Rio Grande do Sul 95900-000 |
| Brazil | 136/Luis Alberto Schittler | CONEP - Comissão Nacional de Ética em Pesquisa  SEPN 510 Norte, Bloco A, 1º subsolo,  Edifício Ex-INAN - Unidade II - Ministério da Saúde Brasília - DF 70750-521 |
| Brazil | 136/Luis Alberto Schittler | Comite de Etica em Pesquisa em Seres Humanos de Universidade de Passo Fundo/RS  BR 285 - km 171 - Campus 1 - Divisao de Pesquisa - Passo Fundo  Rio Grande do Sul 99001-970 |
| Brazil | 137/ Gilberto Schwartsmann | CONEP - Comissão Nacional de Ética em Pesquisa  SEPN 510 Norte, Bloco A, 1º subsolo,  Edifício Ex-INAN - Unidade II - Ministério da Saúde Brasília - DF 70750-521 |
| Brazil | 137/ Gilberto Schwartsmann | Comite de Etica em Pesquisa Hospital de Clinicas de Porto Alegre  Ramiro Barcelos, 2350  Porto Alegre 90035-903 |
| Brazil | 138/ Fabio Andre Franke | CONEP - Comissão Nacional de Ética em Pesquisa  SEPN 510 Norte, Bloco A, 1º subsolo,  Edifício Ex-INAN - Unidade II – Ministério da Saúde  Brasília - DF 70750-521 |
| Brazil | 138/ Fabio Andre Franke | Comitê de Ética em Pesquisa da Universidade Regional do Noroeste do Estado do Rio Grande do Sul - UNIJUÍ  R. do Comercio, 3000 - Bairro Universitario  Ijuí - Rio Grande do Sul 98700-000 |
| Bulgaria | 262/ Galina Kurteva | Ethics Committee for Multicenter Trials  5 Sveta Nedelya sq.  Sofia 1000 |
| Bulgaria | 263/ Violina Taskova | Ethics Committee for Multicenter Trials,  5 Sveta Nedelya sq.  Sofia 1000 |
| Chile | 144/ Pamela Salman Boghikian | Comité Ético-Científico del Servicio de Salud Metropolitano Oriente  Av. Salvador 364, Providencia  Santiago |
| Chile | 145/ Eugenia Loredo Fort | Comité Ético Científico Hospital Dr. Gustavo Fricke  Servicio de Salud Viña de Mar - Quillota (SSVQ)  Calle Limache 1307, esquina Peñablanca, 2do Piso  Viña del Mar |
| Chile | 145/ Eugenia Loredo Fort | Comité Ético Científico Clínica Reñaca  Anabaena 336, Jardin del Mar, Reñaca  Viña del Mar |
| Estonia | 520/ Kristiina Ojamaa | Tallinn Medical Research Ethics Committee  42 Hiiu Str.  Tallinn 11619 |
| Estonia | 521/ Tilt Suuroja | Tallinn Medical Research Ethics Committee  42 Hiiu Str.  Tallinn 11619 |
| France | 280/ Jean-Francois Seitz | Prof. J.E. BAZIN  Président du C.P.P. Sud Est VI  CHU. G. MONTPIED, Administration Centrale  58 rue Montalembert  Clemont Ferrand 63003 |
| France | 281/ Marian Gil Delgado | Prof. J.E. BAZIN  Président du C.P.P. Sud Est VI  CHU. G. MONTPIED, Administration Centrale  58 rue Montalembert  Clemont Ferrand 63003 |
| France | 282/ Christophe Borg | Prof. J.E. BAZIN  Président du C.P.P. Sud Est VI  CHU. G. MONTPIED, Administration Centrale  58 rue Montalembert  Clemont Ferrand 63003 |
| France | 283/ Jean-Marc Phelip | Prof. J.E. BAZIN  Président du C.P.P. Sud Est VI  CHU. G. MONTPIED, Administration Centrale  58 rue Montalembert  Clemont Ferrand 63003 |
| France | 284/ Emmanuelle Samalin | Prof. J.E. BAZIN  Président du C.P.P. Sud Est VI  CHU. G. MONTPIED, Administration Centrale  58 rue Montalembert  Clemont Ferrand 63003 |
| France | 286/ Denis Pezet | Prof. J.E. BAZIN  Président du C.P.P. Sud Est VI  CHU. G. MONTPIED, Administration Centrale  58 rue Montalembert  Clemont Ferrand 63003 |
| France | 287/ Jean Marc Gornet | Prof. J.E. BAZIN  Président du C.P.P. Sud Est VI  CHU. G. MONTPIED, Administration Centrale  58 rue Montalembert  Clemont Ferrand 63003 |
| France | 288/ Philippe Rougier | Prof. J.E. BAZIN  Président du C.P.P. Sud Est VI  CHU. G. MONTPIED, Administration Centrale  58 rue Montalembert  Clemont Ferrand 63003 |
| France | 291/ Christophe Borg | Prof. J.E. BAZIN  Président du C.P.P. Sud Est VI  CHU. G. MONTPIED, Administration Centrale  58 rue Montalembert  Clemont Ferrand 63003 |
| France | 292/ Jean-Philippe Metges | Prof. J.E. BAZIN  Président du C.P.P. Sud Est VI  CHU. G. MONTPIED, Administration Centrale  58 rue Montalembert  Clemont Ferrand 63003 |
| Germany | 302/Severin Daum | Ethikkommission der Ärztekammer Nordrhein  Tersteegenstraße 9  Düsseldorf 40474 |
| Germany | 303/Meinolf Karthaus | Ethikkommission der Ärztekammer Nordrhein  Tersteegenstraße 9  Düsseldorf 40474 |
| Germany | 304/ Jens T. Siveke | Ethikkommission der Ärztekammer Nordrhein  Tersteegenstraße 9  Düsseldorf 40474 |
| Germany | 305/Florian Weissinger | Ethikkommission der Ärztekammer Nordrhein  Tersteegenstraße 9  Düsseldorf 40474 |
| Germany | 308/Stefan Zeuzem | Ethikkommission der Ärztekammer Nordrhein  Tersteegenstraße 9  Düsseldorf 40474 |
| Germany | 309/Hansjochen Wilke | Ethikkommission der Ärztekammer Nordrhein  Tersteegenstraße 9  Düsseldorf 40474 |
| Germany | 310/Gunnar Folprecht | Ethikkommission der Ärztekammer Nordrhein  Tersteegenstraße 9  Düsseldorf 40474 |
| Germany | 311/ Hans-Georg Kopp  APR2012-ongoing  Frank Mayer  SEP2010-APR2012 | Ethikkommission der Ärztekammer Nordrhein  Tersteegenstraße 9  Düsseldorf 40474 |
| Germany | 312/ Volkmar Boehme DEC2010-ongoing Rainer Lipp  SEP2010-DEC2010 | Ethikkommission der Ärztekammer Nordrhein  Tersteegenstraße 9  Düsseldorf 40474 |
| Germany | 316/ Stefan Kasper JAN2012-ongoing  Tanja Trarbach  SEP2010-DEC2011 | Ethikkomission der Ärztekammer Nordrhein  Tersteegenstraße 9  40474 Düsseldorf |
| Germany | 318/Carsten Grüllich | Ethikkommission der Ärztekammer Nordrhein  Tersteegenstraße 9  Düsseldorf 40474 |
| Germany | 319/ Markus Möhler | Ethikkommission der Ärztekammer Nordrhein  Tersteegenstraße 9  Düsseldorf 40474 |
| Germany | 322/ Friedrich Overkamp | Ethikkommission der Ärztekammer Nordrhein  Tersteegenstraße 9  Düsseldorf 40474 |
| Germany | 323/ Burkhard Schmidt | Ethikkommission der Ärztekammer Nordrhein  Tersteegenstraße 9  Düsseldorf 40474 |
| Germany | 326/ Salah-Eddin Al-Batran | Ethikkomission der Ärztekammer Nordrhein  Tersteegenstraße 9  40474 Düsseldorf |
| Germany | 328/ Peter Thuss-Patience | Ethikkommission der Ärztekammer Nordrhein  Tersteegenstraße 9  Düsseldorf 40474 |
| Hong Kong | 730/ Kent-Man Chu | HKU/HA HK W Institutional Review Board  Room 901, Administration Block, Queen Mary Hospital  102 Pokfulam Road |
| Hong Kong | 731/ Sing Hung Lo | NTW Cluster Clinical & Research Ethics Committee Office Room 5.130, 5/F, Rehabilitation Block, Tuen Mun Hospital Tuen Mun, New Territories |
| Hungary | 330/ Judit Kocsis | Egeszsegugyi Tudomanyos Tanacs  Klinikai Farmakologiai Etikai Bizottsaga  Arany Janos u. 6-8  Budapest, H-1051 |
| Hungary | 331/ Magdolna Dank | Egeszsegugyi Tudomanyos Tanacs  Klinikai Farmakologiai Etikai Bizottsaga  Arany Janos u. 6-8  Budapest, H-1051 |
| Hungary | 332/ Jozsef Cseh | Egeszsegugyi Tudomanyos Tanacs  Klinikai Farmakologiai Etikai Bizottsaga  Arany Janos u. 6-8  Budapest, H-1051 |
| Hungary | 333/ Bela Piko | Egeszsegugyi Tudomanyos Tanacs  Klinikai Farmakologiai Etikai Bizottsaga  Arany Janos u. 6-8  Budapest, H-1051 |
| Hungary | 334/ Laszlo Mangel | Egeszsegugyi Tudomanyos Tanacs  Klinikai Farmakologiai Etikai Bizottsaga  Arany Janos u. 6-8  Budapest, H-1051 |
| Hungary | 335/ Gyorgy Bodoky | Egeszsegugyi Tudomanyos Tanacs  Klinikai Farmakologiai Etikai Bizottsaga  Arany Janos u. 6-8  Budapest, H-1051 |
| Hungary | 336/ Balazs Pécsi | Egeszsegugyi Tudomanyos Tanacs  Klinikai Farmakologiai Etikai Bizottsaga  Arany Janos u. 6-8  Budapest, H-1051 |
| Israel | 351/ Ayala Hubert | Helsinki Committe (IRB) of Hadassah Medical Organization  Kiryat Hadassah P.O. Box 12000  Jerusalem 91120 |
| Israel | 352/ Alexander Beny | Helsinki Committe of Rambam Health Care Campus  8 Ha'alia st., Bat Galim  Haifa 31096 |
| Israel | 354/ Alexander Gluzman | Helsinki Committe of Soroka University Medical Center  Itzchak Rager Blvd. P.O. Box 151  Be'er-Sheva 84101 |
| Israel | 355/Ravit Geva | Helsinki Committe of Tel Aviv Sourasky Medical Center  6 Weizmann St.  Tel Aviv 64239 |
| Israel | 356 / Dan Aderka | Helsinki Committe (IRB) of Chaim Sheba Medical Center  Tel-Hashomer 52621 |
| Israel | 357/ Natalya Karminsky | Helsinki Committe of E. Wolfson Medical Center  62 Halohamim St.  Holon 58100 |
| Israel | 358/ Baruch Brenner | Helsinki Committe of Rabin Medical Center,  Beilinson Hospital  39 Jabotinski Street  Petah Tikva 49100 |
| Italy | 371/ Davide Pastorelli | Comitato Etico dell'IRCCS  Istituto Oncologico Veneto di Padova  Via Gattamelata 64  Padova 35128 |
| Italy | 372/ Roberto Bordonaro | Comitato Etico CATANIA 2  Azienda Ospedaliera di Rilievo Nazionale di Alta Specializzazione Garibaldi di Catania  P.zza S.M. Gesù 5  Catania 95125 |
| Italy | 374/ Giordano Beretta | Azienda Ospedaliera (AO) Giovanni XXIII  COMITATO DI BIOETICA DELLA AZIENDA OSPEDALIERA  Piazza OMS 1  Bergamo 24127 |
| Italy | 375/ Gabriella Farina | IRCCS Policlinico  Direzione Scientifica - Palazzo Uffici II piano  Fondazione IRCCS Ca’ Granda Ospedale Maggiore Policlinico  Via F. Sforza, 28  Milano 20122 |
| Italy | 376/ Stefano Cascinu | Comitato Etico A.O. Universitaria Ospedali Riuniti Umberto I  Lancisi - Salesi  Via Conca 71  Ancona 60100 |
| Italy | 378/ Libero Ciuffreda | Comitato Etico dell'Azienda Ospedaliera Universitaria S. Giovanni Battista di Torino  C.so Bramante 88/90  Torino 10126 |
| Italy | 379/ Alfredo Falcone | Comitato Etico per la Sperimentazione dei Farmaci  Azienda Ospedaliera Universitaria di Pisa  Via Roma 67  Pisa 56126 |
| Italy | 380/ Alberto Sobrero | Comitato Etico dell'Azienda Ospedaliera Universitaria di S. Martino di Genova  Largo Rosanna Benzi 10  Genova 16132 |
| Italy | 381/ Nicola Silvestris FEB2012-ongoing  Giuseppe Colucci  JUL2010-FEB2012 | Comitato Etico  Istituto Tumori "Giovanni Paolo II"  IRCCS Ospedale Oncologico Bari  Via S.F. Hahnemann, 10  Bari 70126 |
| Japan | 801/ Yoshito Komatsu | Hokkaido University Hospital Institutional Review Board  Kita14, Nishi5,Kita-ku, Sapporo,  Hokkaido  060-8648 |
| Japan | 802/ Seigo Yukisawa DEC2012-ongoing Etsuko Warita  JUL2011-DEC2012  Yasuo Hamamoto  OCT2010-JUN2011 | IRB of Tochigi Cancer Center 4-9-13 Yonan Utsunomiya, Tochigi  320-0834 |
| Japan | 803/ Hirofumi Fujii  MAR2012-ongoing  Michitaka Nagase  APR2011-MAR2012 | IRB of Jichi Medical University Hospital 3311-1 Yakushijii Shimotsuke  Tochigi  329 0498 |
| Japan | 804/ Toshihiko Doi | Institutional Review Board for National Cancer Center 5-5-1- Tsukiji, Chuo-ku,  Tokyo  104-0045 |
| Japan | 805/ Kensei Yamaguchi | Institutional Review Board of Saitama Cancer Center 818 Komuro, Ina-machi, Kitaadachi-gun,  Saitama  362-0806 |
| Japan | 806/ Yoshihiko Segawa FEB2013-ongoing Ken Shimada MAY2012-FEB2013 Yasutsuna Sasaki  APR2011-MAY2012 | Saitama Medical University International Medical Center Institutional Review Board 1397-1, Yamane Hidaka Saitama  350-1298 |
| Japan | 807/ Shuichi Hironaka | IRB of Chiba Cancer Center 666-2 Nitona-cho, Chou-ku Chiba-shi  Chiba  260-8717 |
| Japan | 808/ Yasuhiro Shimada | National Cancer Center Hospital Institutional Review Board 5-1-1-Tsukiji, Chuo-hu,  Tokyo  104-0045 |
| Japan | 809/ Yasushi Omuro | IRB of Tokyo Metropolitan Komagome Hospital 18-22, Honkomagome 3chome,  Bunkyo-ku,  Tokyo  113-8677 |
| Japan | 810/ Hirofumi Yasui | Shizuoka Cancer Center IRB 1007 Shimonagakubo, Nagaizumi-cho,  Shizouka  411-8777 |
| Japan | 811/ Kei Muro APR2012-ongoing  AUG2010-AUG2011  Kohei Shitara  SEP2011-APR2012 | Aichi Cancer Center   - 1. Kanokoden, Chikusa-ku,   Nagoya  464-8681, |
| Japan | 812/ Naotoshi Sugimoto | IRB of Osaka medical Center for Cancer and Cardiovascular Disease  1-3-3 Nakamichi, Higashinari-ku, Osaka-shi,  Osaka  537-8511 |
| Japan | 813/ Fumio Nagashima | IRB of Kyorin University Hospital  6-20-2 Shinkawa, Mitaka-shi,  Tokyo  181-8611 |
| Japan | 814/ Masahiro Gotoh MAY2012-ongoing  Hiroya Takiuchi  SEP2010-MAY2012 | Osaka Medical College Hospital Institutional Review Board  2-7 Daigaku-machi, Takatsuki,  Osaka  69-8686 |
| Japan | 815/ Takao Tamura  APR2013-ongoing  Shinya Ueda  MAR2011-MAR2013  Taro Sato  SEP2010-Mar2011 | Kinki University Hospital Institutional Review Board  377-2, Ohno-Higashi, Osaka-Sayama,  Osaka  589-8511 |
| Japan | 816/ Motohiro Hirao  MAR2013-ongoing  Kazumasa Fujitani  NOV2010-MAR2013 | National Hospital Organization Osaka National Hospitallnstitutional Review Board  2-1-14 Houenzaka, Chuo-ku, Osaka-shi,  Osaka  540-0006 |
| Japan | 817/ Tomohiro Nishina | Shikoku Cancer Center  Ko 160, Minamiumemoto-machi,  Matsuyama,  Ehime  791-0280 |
| Japan | 818/ Sojiro Morita  JUL2011-ongoing  Akihito Tsuji  OCT2010-JUL2011 | IRB of Kochi Health Sciences Center  2125-1 Ike Kochi-shi  Kochi  781-8555 |
| Japan | 819/ Taito Esaki | National Kyushu Cancer Center  3-1-1 Notame, Minami-ku, Fukuoka-shi,  Fukuoka  11-1395 |
| Japan | 820/ Yoshinori Hirashima | IRB of Olta University Hospital   - 1. Idaigaoka, Hasama-machi, Yufu-shi,   Oita  879-5593 |
| South Korea | 830/ Sang Cheul Oh | Institutional Review Board of korea University Guro Hospital  97, Gurodong-Gil, Guro-Gu,  Seul, 152-703 |
| South Korea | 832/ Hoon-Kyo Kim | Institutional Review Board of of St. Vincente's Hospital, The Catholic University of Korea,  93-6, Ji-dong, Paldal-gu, Suwon,  Gyeonggi-do, 442-723 |
| South Korea | 833/ Keun Wook Lee  OCT2013-ongoing  MAY2010-SEP2012  Jin Won Kim  SEP2012-OCT2013 | Institutional Review Board of of Seul National University Bundang Hospital,  166 gumi-ro, Bundang-gu, Seongnam,  Gyneonggi-do, 463-707 |
| South Korea | 834/ Tae-You Kim | Institutional Review Board of Seul National University Hospital,  101 Daehang-Ro (28 Yeangeong-dong), Jongno-Gu,  Seul, 110-744 |
| Korea | 835/ Dong Bok Shin | Institutional Review Board of Gachon University  Gil Hospital,  1198, Guwol-dong, Namdong-gu,  Incheon, 405-760 |
| Korea | 836/ Seok Yun Kang | Insitutional Review Board of Ajou University Hospital,  San 5, Wonchon-dong, Yeongtong-gu,  Suwon, 443-721 |
| Lithuania | 391/ Alvydas Cesas | Lithuanian Bioethics Committee  Didzioji str. 22  Vilnius LT-01128 |
| Lithuania | 392/Audrius Ivanauskas | Lithuanian Bioethics Committee  Didzioji str. 22  Vilnius LT-01128 |
| Mexico | 151/ Francisco Gutierrez-Delgado | Comite de Ética del Centro de Estudios y Prevención del Cáncer AC (CEPREC)  Bugambilias #30 Fraccionamiento La Riviera. Juchitan,  Oaxaca 70000 |
| Poland | 400/ Jerzy Tujakowski | Komisja Bioetyczna przy  Okregowej Izbie lekarskiej w Lodzi  ul. Czerwona 3  Lodz 93-005 |
| Poland | 401/ Maria Blasinska-Morawiec | Komisja Bioetyczna przy  Okregowej Izbie lekarskiej w Lodzi  ul. Czerwona 3  Lodz 93-005 |
| Poland | 402/ Dariusz Sawka | Komisja Bioetyczna przy  Okregowej Izbie lekarskiej w Lodzi  ul. Czerwona 3  Lodz 93-005 |
| Poland | 403/ Elzbieta Staroslawska | Komisja Bioetyczna przy  Okregowej Izbie lekarskiej w Lodzi  ul. Czerwona 3  Lodz 93-005 |
| Poland | 404/ Tomasz Sarosiek | Komisja Bioetyczna przy  Okregowej Izbie lekarskiej w Lodzi  ul. Czerwona 3  Lodz 93-005 |
| Poland | 405/ Zbigniew Nowecki | Komisja Bioetyczna przy  Okregowej Izbie lekarskiej w Lodzi  ul. Czerwona 3  Lodz 93-005 |
| Poland | 407/ Elzbieta Wojcik | Komisja Bioetyczna przy  Okregowej Izbie lekarskiej w Lodzi  ul. Czerwona 3  Lodz 93-005 |
| Poland | 408/ Joanna Pikiel | Komisja Bioetyczna przy  Okregowej Izbie lekarskiej w Lodzi  ul. Czerwona 3  Lodz 93-005 |
| Portugal | 421/ Margarida Damasceno | CEIC (Comissão de Ética Para a Investigação Clínica)  Parque da Saúde de Lisboa  Avenida do Brasil, 53 - Pav. 17-A  Lisbon 1749-004 |
| Portugal | 423/ Nuno Bonito | CEIC (Comissão de Ética Para a Investigação Clínica)  Parque da Saúde de Lisboa  Avenida do Brasil, 53 - Pav. 17-A  Lisbon 1749-004 |
| Portugal | 424/ Paula Ferreira | CEIC (Comissão de Ética Para a Investigação Clínica)  Parque da Saúde de Lisboa  Avenida do Brasil, 53 - Pav. 17-A  Lisbon 1749-004 |
| Romania | 440/ Mihai Voiculescu | Ministry of Health  National Ethic Committee for Clinical Study of Medicines  Av. Sanatescu nr.48, sector 1  Bucaresti, 011478 |
| Romania | 444/ Cornelia Toganel | Ministry of Health  National Ethic Committee for Clinical Study of Medicines  Av. Sanatescu nr.48, sector 1  Bucaresti, 011478 |
| Romania | 447/ Constantin Volvat | Ministry of Health  National Ethic Committee for Clinical Study of Medicines  Av. Sanatescu nr.48, sector 1  Bucaresti, 011478 |
| Romania | 448/ Dumitru Filip | Ministry of Health  National Ethic Committee for Clinical Study of Medicines  Av. Sanatescu nr.48, sector 1  Bucaresti, 011478 |
| Russia | 460/ Irina Davidenko | Local Ethics Committee of GUZ Clinical Oncology Dispensary #1 of healthcare department of Krasnodar region 146, Dimitrova ul.  Krasnodar 350040 |
| Russia | 461/ Oleg Lipatov | Local Ethics commitee at GUZ Republican Clinical Oncological Dispensary  73/1, Oktyabrya prospect  Ufa 450054 |
| Russia | 462/ Sergey Tjulandin | Local Ethics commitee at Russian oncology research center n.a. N. N. Blokhin of RAMS  24, Kshirskoe shosse  Moscow 115478 |
| Russia | 466/ Sergy Orlov | Local Ethics committee at ООО  “International clinic MEDEM”  6 Marata Str, Lit.A  Saint-Petersburg 191025 |
| Singapore | 860/ Peter Ang Cher Siang | Parkway Independent Ethics Committee  c/o Gleneagles CRC Pte Ltd  ParkwayHealth Day Surgery & Medical Centre  363 Balestier Road, Level 4  Singapore 329 784 |
| Singapore | 861/ Akhil Chopra | Johns Hopkins Medical Institutional Review Boards  1620 McElderry St., Reed Hall - B130,  Baltimore, Maryland 21205-1911 |
| Singapore | 861/ Akhil Chopra | Domain Specific Review Boards (DSRB) Domain B  No. 6, Commonwealth Lane,  Level 6 GMTI Building  Singapore 149547 |
| Spain | 480/ Carlos García Girón | Comitè Etico de Investigacion Clinica Corporaciò Sanitaria Parc Taulì Edifici Santa Fe Ala Izquierda  2° planta C/Parc Taulì, 1  Sabadell – Barcellona 08208 |
| Spain | 481/ Hermini Manzano | Comitè Etico de Investigacion Clinica Corporaciò Sanitaria Parc Taulì Edifici Santa Fe Ala Izquierda  2° planta C/Parc Taulì, 1  Sabadell – Barcellona 08208 |
| Spain | 483/ Carles Pericay | Comitè Etico de Investigacion Clinica Corporaciò Sanitaria Parc Taulì Edifici Santa Fe Ala Izquierda  2° planta C/Parc Taulì, 1  Sabadell – Barcellona 08208 |
| Spain | 484/ Jose Enrique Alés | Comitè Etico de Investigacion Clinica Corporaciò Sanitaria Parc Taulì Edifici Santa Fe Ala Izquierda  2° planta C/Parc Taulì, 1  Sabadell – Barcellona 08208 |
| Spain | 485/ David Vicente | Comitè Etico de Investigacion Clinica Corporaciò Sanitaria Parc Taulì Edifici Santa Fe Ala Izquierda  2° planta C/Parc Taulì, 1  Sabadell – Barcellona 08208 |
| Spain | 486/ Maria Luisa Miron Limon | Comitè Etico de Investigacion Clinica Corporaciò Sanitaria Parc Taulì Edifici Santa Fe Ala Izquierda  2° planta C/Parc Taulì, 1  Sabadell – Barcellona 08208 |
| Spain | 487/ Encarnacion Jimenez Orozco | Comitè Etico de Investigacion Clinica Corporaciò Sanitaria Parc Taulì Edifici Santa Fe Ala Izquierda  2° planta C/Parc Taulì, 1  Sabadell – Barcellona 08208 |
| Spain | 488/ Antonio Sánchez | Comitè Etico de Investigacion Clinica Corporaciò Sanitaria Parc Taulì Edifici Santa Fe Ala Izquierda  2° planta C/Parc Taulì, 1  Sabadell – Barcellona 08208 |
| Spain | 489/ José Antonio López Martín | Comitè Etico de Investigacion Clinica Corporaciò Sanitaria Parc Taulì Edifici Santa Fe Ala Izquierda  2° planta C/Parc Taulì, 1  Sabadell – Barcellona 08208 |
| Taiwan | 880/ Chia-Jui Yen | National Cheng Kung University Hospital  Institutional Review Board,  No.138 Sheng-Li Rd,  Tainan 704 |
| Taiwan | 881/ Yee Chao | Taipei Veterans General Hospital  Institutional Review Board,  201 Shih-Pai Road, Sec.2,  Tapei 11217 |
| Taiwan | 882/ Chang-Fang Chiu | China Medical University Hospital, Taichung  Institutional Review Board,  No.2 Yuh-Der Road  Taichung City 40447 |
| Taiwan | 883/ Yen-Yang Chen | Chang Gung Medical Foundation Kaohsiung Branch Institutional Review Board  No.123, Dinghu, Guishan Township,  Taoyan Country 333 |
| Taiwan | 884/ Cheng-Shyong Chang | Institutional Review Board  135 Nan-Hsiao, Street,  Changhua 500 |
| Taiwan | 885/ Chien-Liang Lin | Chi-Mei Medical Center-LiouYing Branch  Institutional Review Board  No.201, Taikang Village,  Liouying Township, Tainan Country, 736 |
| United Kingdom | 501/ Sebastian Cummins OCT2012-ongoing  Gary Middleton  APR2011-OCT2012 | NRES Committee London - West London  Nottingham REC Centre  The Old Chapel  Royal Standard Court  Nottingham NG1 6FS |
| United Kingdom | 502/ David Cunningham | NRES Committee London - West London  Nottingham REC Centre  The Old Chapel  Royal Standard Court  Nottingham NG1 6FSNottingham NG1 6FS |
| United Kingdom | 504/ David Cunningham | NRES Committee London - West London  Nottingham REC Centre  The Old Chapel  Royal Standard Court  Nottingham NG1 6FS |
| United Kingdom | 505/ David Raymond Ferry | NRES Committee London - West London  Nottingham REC Centre  The Old Chapel  Royal Standard Court  Nottingham NG1 6FS |
| USA | 170/ Bassel El-Rayes | Western Institutional Review Board  3535 7th Avenue SW  Olympia, WA 98502 |
| USA | 172/ Edward Lin | Western Institutional Review Board  3535 7th Avenue SW  Olympia, WA 98507 |
| USA | 174/ Zev Wainberg | Office of the Human Research Protection Program  Box 951694  11000 Kinross Avenue, Suite 102  Los Angeles, CA 90095-1694 |
| USA | 178/ Troy Guthrie | Baptist Medical Center  Institutional Review Committee  820 Prudential Drive, Suite 413  Jacksonville, FL 32207 |
| USA | 180/ Yehuda Patt | Western Institutional Review Board  3535 7th Avenue SW  Olympia, WA 98503 |
| USA | 181/ Andrew Ko | Committee on Human Research (CHR)  Office of Research  3333 California Street, Suite 315  University of California  San Francisco, CA 94118-0962 |
| USA | 182 – Gabriel Domenech | Quorum Review IRB  1601 Fifth Avenue, Suite 1000  Seattle, WA 98101 |
| USA | 183/ Jitendra Gandhi | Quorum Review IRB  1601 Fifth Avenue, Suite 1000  Seattle, WA 98101 |
| USA | 185/ Raul R. Mena AUG2013-ongoing  Peter J. Rosen  NOV2010-JUL2013 | Providence Saint Joseph Medical Center IRB  501 South Buena Vista Street  Burbank, CA 91509 |
| USA | 187/ Jaffer Ajani | The University of Texas  M.D. Anderson Cancer Center  Institutional Review Board  1515 Holcombe Boulevard, Unit 1437  Houston, TX 77030 |

[[DFT, after this page, please insert CP12-0922 Master ICF v 7_20121115_FINAL_clean with instructions retained.doc.]]
